# Supplementary material for: Fast Diffusion of the Unassembled PetC1-GFP Protein in the Cyanobacterial Thylakoid Membrane
Source: MDPI journal article supplement (doi:10.3390/life11010015), 2020-12-29
Supplement: s1 [file s1]

Supplemental Material

# Fast Diffusion of the Unassembled PetC1-GFP Protein in the Cyanobacterial Thylakoid Membrane

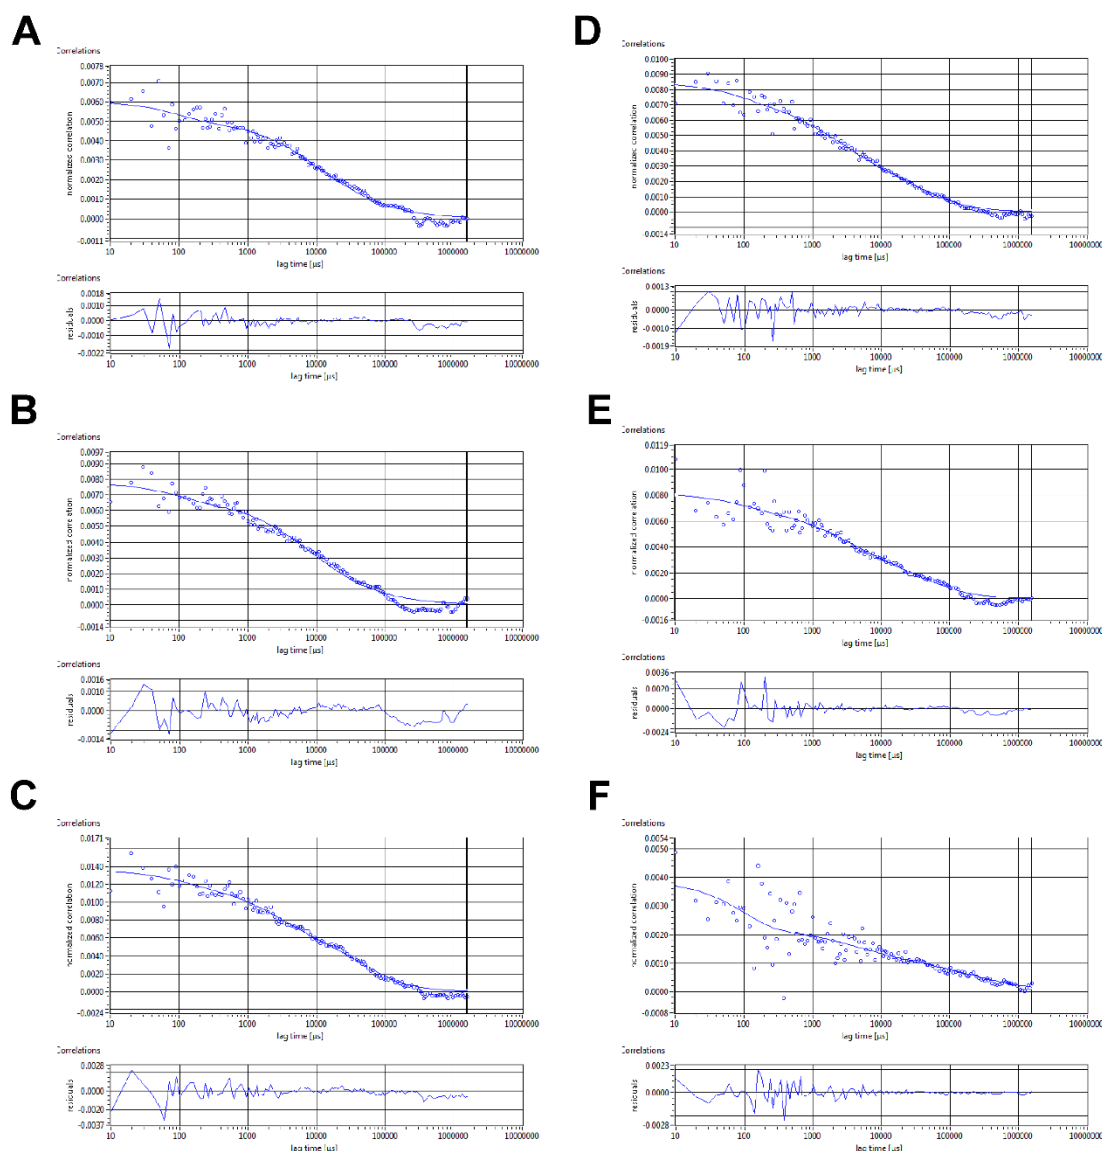

**Supplemental Figure 1. Several examples of normalized autocorrelation functions of PetC1-GFP protein in several cells of *Synechocystis*.** Points represent experimental data of calculated autocorrelation functions, lines show fit by 2D model of diffusion for PetC1-GFP. Residual values from the fit are shown below the main figures.

**Publisher's Note:** MDPI stays neutral with regard to jurisdictional claims in published maps and institutional affiliations.

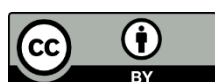

© 2020 by the authors. Submitted for possible open access publication under the terms and conditions of the Creative Commons Attribution (CC BY) license (<http://creativecommons.org/licenses/by/4.0/>).
